# Supplementary material
Source: Springer Nature journal article supplement (https://mijn.bsl.nl/resource/supplementary/13047_2008_12_MOESM1_ESM.pdf/7108724)
Supplement: MOESM1 [file 7108724]



Gel Pad

This is a B-mode ultrasound image showing a curved, layered structure. The top layer is labeled 'Gel Pad', the middle layer is 'Skin', and the bottom layer is 'AbdH'. A white arrow points to the 'AbdH' layer. On the right side, there are three vertical double-headed arrows indicating depth or distance. In the bottom left corner, there is a small diagram with 'G' above it, 'P' on the left, and 'R' on the right, with '5.0' and '12.0' below it. The Philips logo is in the bottom left corner.

Skin

AbdH →

G  
P ▲ R  
5.0 12.0

PHILIPS
